# Supplementary material for: Thermo-responsive molecularly imprinted sensor based on the surface-enhanced Raman scattering for selective detection of R6G in the water
Source: Royal Society of Chemistry journal article supplement (doi:10.1039/c7dt02495a), 2017-01-01
Supplement: c7dt02495a1.pdf [file c7dt02495a1.pdf]

## SUPPLEMENTARY MATERIAL

### **Thermo-responsive molecularly imprinted sensor based on the surface-enhanced Raman scattering for selective detection of R6G in the water**

Hongji Li<sup>a</sup>, Xiaonan Wang<sup>b</sup>, Zirun Wang<sup>b</sup>, Jiaqi Jiang<sup>b</sup>, Maobin Wei<sup>c</sup>, Jiahong Zheng<sup>d</sup>, Yongsheng Yan<sup>a\*</sup>, Chunxiang Li<sup>a\*</sup>

<sup>a</sup>Institute of Green Chemistry and Chemical Technology, College of Chemistry and Chemical Engineering, Jiangsu University, Zhenjiang 212013, China

<sup>b</sup>College of Chemistry, Jilin Normal University, Siping, 136000, China

<sup>c</sup>College of Physics, Jilin Normal University, Siping, 136000, China

<sup>d</sup>College of Materials Science and Engineering, Chang'an University, Xi'an 710061, China

## **Experimental details**

### **Photocatalytic degradation of R6G.**

Generally, a certain amount of ZOA-TMIPs was dispersed in 10 mL of R6G solution with the concentration of  $10^{-5}$  mol L<sup>-1</sup> in different tubes, respectively. Through adequate UV irradiation and the solutions were adequately stirred in the dark for 1.0 h to exclude the influence of self-adsorption of the ZOA-TMIPs to the R6G. A mercury lamp with the power of 15 W was used as the UV light source. The photocatalytic degradation of R6G was analyzed by recording the maximum absorbance of R6G through the UV spectrophotometer every 20 min after 1.0 h adsorption.

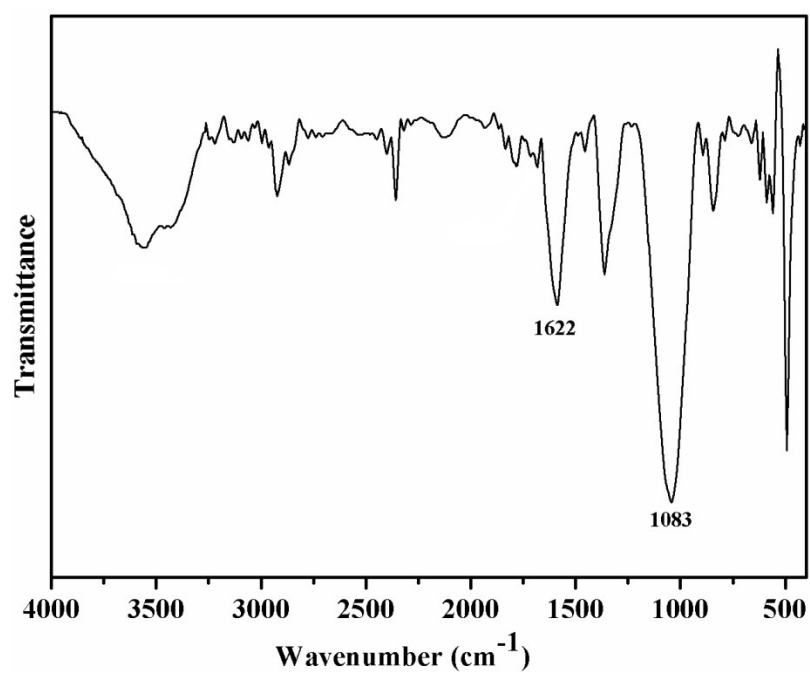

Figure S1. The FT-IR spectra of ZOA-MPS.

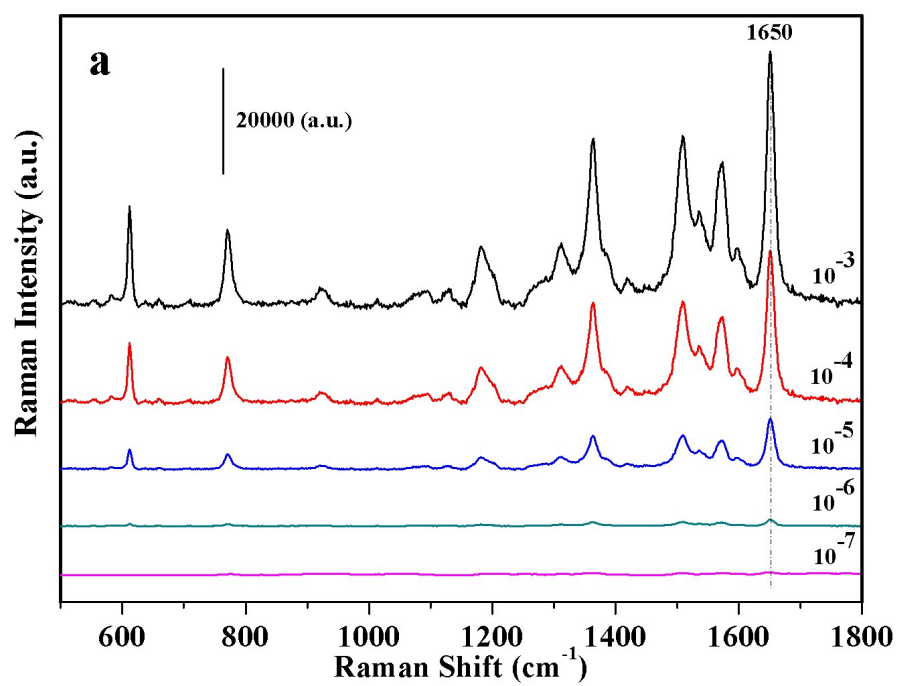

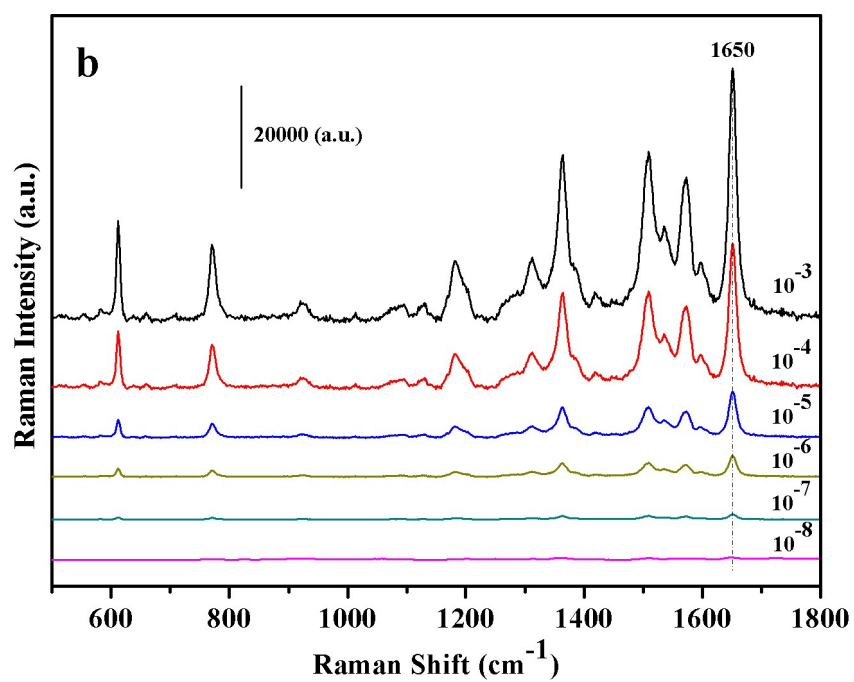

**Figure S2.** The SERS spectra of different concentrations of R6G obtained from Ag NPs (a) and ZnO/Ag heterostructures (b).

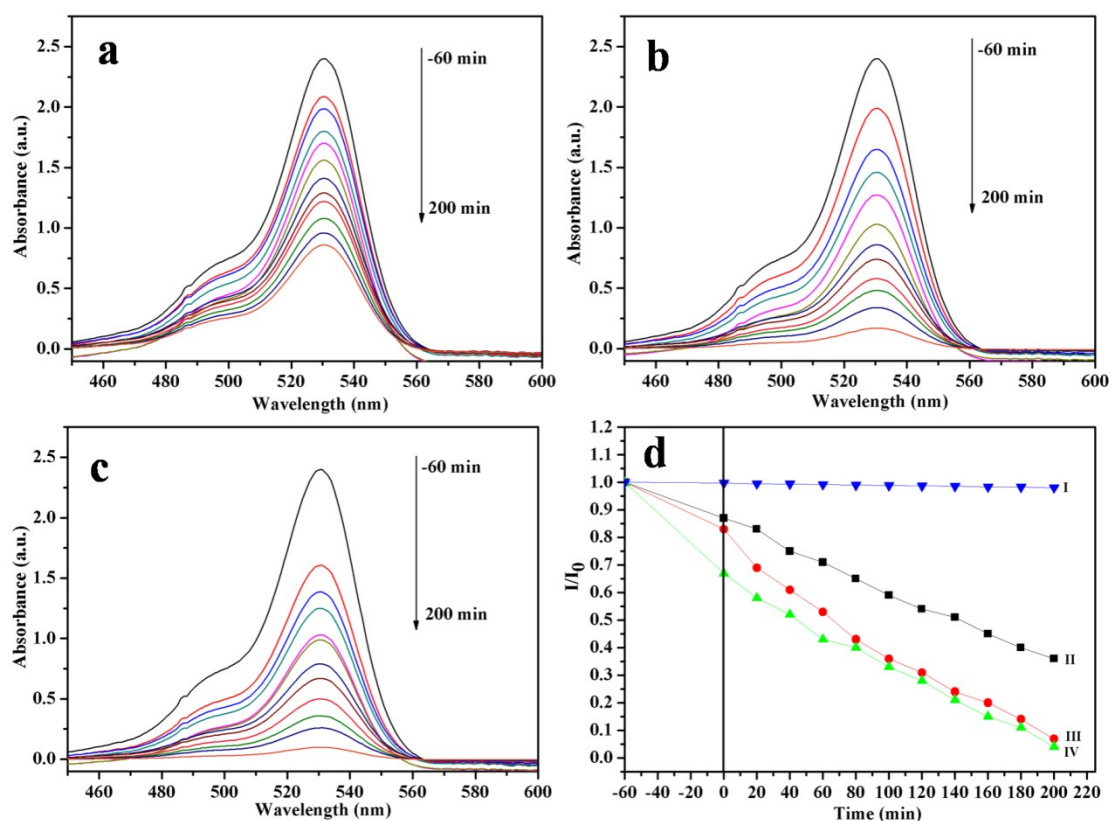

**Figure S3.** UV-vis absorption spectra showing UV-degradation of  $10^{-5}$  mol L $^{-1}$  R6G using the ZnO NRs catalyst (a), ZnO-Ag heterostructures catalyst (b) and ZOA-TMIPs catalyst (c). Evolution of R6G concentration versus UV irradiation time in the presence of different catalysts: Blank test (I), ZnO NRs (II), ZnO-Ag heterostructures (III), ZOA-TMIPs (IV).
